# Supplementary material for: Assessing the prevalence, products, and pathways of dissolved organic matter partial photo-oxidation in arctic surface waters
Source: Royal Society of Chemistry journal article supplement (doi:10.1039/c9em00504h), 2020-01-01
Supplement: c9em00504h1.pdf [file c9em00504h1.pdf]

**Supporting information for:**

**Assessing the prevalence, products, and pathways of dissolved organic matter partial photo-oxidation in arctic surface waters**

*Collin P. Ward<sup>1\*</sup> & Rose M. Cory<sup>2\*</sup>*

<sup>1</sup>Department of Marine Chemistry and Geochemistry, Woods Hole Oceanographic Institution, Woods Hole, Massachusetts 02543, USA

<sup>2</sup>Department of Earth and Environmental Sciences, University of Michigan, 1100 North University Avenue, Room 2354, Ann Arbor, Michigan 48109, USA

\*Corresponding authors:

Phone: +1 508 289 2931; email: [cward@whoi.edu](mailto:cward@whoi.edu)

Phone: +1 734 615 3199; email: [rmcory@umich.edu](mailto:rmcory@umich.edu)

**Table S1.** Sensitivity analysis of the partial photo-oxidation (PPO) of DOM. The goal is to test the impact of photo-decarboxylation reactions on the magnitude of PPO of DOM. In this analysis, photo-decarboxylation reactions are assumed to require 0.5 mol O<sub>2</sub> per mol CO<sub>2</sub> produced, rather than the commonly assumed requirement of 1 mol O<sub>2</sub> per mol CO<sub>2</sub>. The y-axis shows the proportion of CO<sub>2</sub> production from photo-decarboxylation reactions, ranging from 0 to 100%. The x-axis shows a range of photochemical O<sub>2</sub> consumption to CO<sub>2</sub> production ratios from 1 to 5. The control scenario (highlighted in yellow) is that the ratio of photochemical O<sub>2</sub> consumption to CO<sub>2</sub> production is 1, 1 mol of O<sub>2</sub> is required per mol of CO<sub>2</sub> produced, and no CO<sub>2</sub> production comes from photo-decarboxylation. In this scenario, all O<sub>2</sub> consumption is assumed to be required for CO<sub>2</sub> production, and thus no partial photo-oxidation occurs. All values are reported in  $\mu$ M of partially oxidized C.

|                                                                     |     | Photochemical O <sub>2</sub> Consumption to CO <sub>2</sub> Production |     |    |    |    |     |
|---------------------------------------------------------------------|-----|------------------------------------------------------------------------|-----|----|----|----|-----|
|                                                                     |     | 1                                                                      | 1.5 | 2  | 3  | 4  | 5   |
| Proportion of CO <sub>2</sub> production from photo-decarboxylation | 1.0 | 30                                                                     | 40  | 50 | 70 | 90 | 110 |
|                                                                     | 0.9 | 27                                                                     | 37  | 47 | 67 | 87 | 107 |
|                                                                     | 0.8 | 24                                                                     | 34  | 44 | 64 | 84 | 104 |
|                                                                     | 0.7 | 21                                                                     | 31  | 41 | 61 | 81 | 101 |
|                                                                     | 0.6 | 18                                                                     | 28  | 38 | 58 | 78 | 98  |
|                                                                     | 0.5 | 15                                                                     | 25  | 35 | 55 | 75 | 95  |
|                                                                     | 0.4 | 12                                                                     | 22  | 32 | 52 | 72 | 92  |
|                                                                     | 0.3 | 9                                                                      | 19  | 29 | 49 | 69 | 89  |
|                                                                     | 0.2 | 6                                                                      | 16  | 26 | 46 | 66 | 86  |
|                                                                     | 0.1 | 3                                                                      | 13  | 23 | 43 | 63 | 83  |
|                                                                     | 0.0 | 0                                                                      | 10  | 20 | 40 | 60 | 80  |
